# Supplementary material
Source: HighWire-hosted journal article supplement (https://www.jrheum.org/highwire/filestream/33821/field_highwire_adjunct_files/0/171033DataSuppl.pdf)

**ONLINE SUPPLEMENTARY DATA**

*Supplementary Table 1.* SLE patient demographics and Lectin Pathway protein measurements at the two Danish inclusion sites.

| <b>Danish cohorts: Aarhus vs. Odense</b>                  |                |                |
|-----------------------------------------------------------|----------------|----------------|
|                                                           | <b>Aarhus</b>  | <b>Odense</b>  |
| <i>Patient number</i>                                     | 169            | 203            |
| <i>Age at inclusion, mean (sd)</i>                        | 45.4<br>(14.9) | 47.8<br>(14.3) |
| <i>Age at diagnosis, mean (sd)</i>                        | 33.5           | 35.9           |
| <i>Gender F (%)</i>                                       | 90             | 86             |
| <i>Ethnicity: Caucasian (%)</i>                           | 97             | 97             |
| <b>ACR criteria (cumulative)</b>                          |                |                |
| <i>Number of ACR criterias, mean (sd)</i>                 | 6.3 (1.2)      | 5.6 (1.6)      |
| <i>Malar rash (ACR1) (%)</i>                              | 65.7           | 50.7           |
| <i>Discoid lupus (ACR2) (%)</i>                           | 5.3            | 5.4            |
| <i>Photosensitivity (ACR3) (%)</i>                        | 67.5           | 59.2           |
| <i>Oral/nasal ulcers (ACR4) (%)</i>                       | 44.4           | 23.8           |
| <i>Arthritis (ACR5) (%)</i>                               | 91.7           | 86.2           |
| <i>Serositis (ACR6) (%)</i>                               | 34.9           | 42.6           |
| <i>Nephritis (ACR7) (%)</i>                               | 31.4           | 36.0           |
| <i>CNS (ACR8) (%)</i>                                     | 8.4            | 16.3           |
| <i>Hematological (ACR9) (%)</i>                           | 89.9           | 55.7           |
| <i>Immunological (ACR10) (%)</i>                          | 90.5           | 85.7           |
| <i>ANA (ACR11) (%)</i>                                    | 98.2           | 100            |
| <b>Clinical and biochemical data at time of inclusion</b> |                |                |
| <i>SLEDAI at inclusion, mean (sd)</i>                     | 3.9 (3.3)      | 2.5 (2.7)      |
| <i>SLICC, mean (sd)</i>                                   | 0.9 (1.2)      | 1.7 (2.9)      |
| <b>Treatment at time of inclusion</b>                     |                |                |
| <i>Hydroxychloroquine treatment (%)</i>                   | 79.6           | 48.8           |
| <i>Prednisolone treatment (%)</i>                         | 57.4           | 51.7           |
| <i>Other immuno-suppressives (%)</i>                      | 39.5           | 44.8           |
| <b>Lectin Pathway Proteins (median ng/ml)</b>             |                |                |
| <i>MBL</i>                                                | 1776           | 1595           |
| <i>M-ficolin</i>                                          | 2414           | 2349           |
| <i>H-ficolin</i>                                          | 45195          | 43795          |
| <i>CL-L1</i>                                              | 449            | 470            |
| <i>CL-K1</i>                                              | 445            | 475            |
| <i>MASP-1</i>                                             | 10621          | 10806          |
| <i>MASP-3</i>                                             | 6977           | 7431           |
| <i>MAp44</i>                                              | 2326           | 2482           |
| <i>MASP-2</i>                                             | 492            | 583            |
| <i>MAp19</i>                                              | 342            | 372            |

**Supplementary Figure 1.** Displays LP protein concentrations in SLE patients with and without kidney affection based on the ACR-7 criteria.

|                   | <i>SLE patients with kidney affection (+ACR 7) (n=125)</i><br>Median serum conc.<br>$\mu\text{g/ml}$ (range) | <i>SLE patients without kidney affection (-ACR 7) (n=240)</i><br>Median serum conc.<br>$\mu\text{g/ml}$ (range) | <i>p-value</i> |
|-------------------|--------------------------------------------------------------------------------------------------------------|-----------------------------------------------------------------------------------------------------------------|----------------|
| <i>MBL</i>        | 1.794 (0 – 7.821)                                                                                            | 1.286 (3 – 9.976)                                                                                               | 0.074          |
| <i>M-ficolin</i>  | 2.498 (0.642-7.297)                                                                                          | 2.330 (0.528-6.991)                                                                                             | 0.658          |
| <i>L-ficolin*</i> | 3.482 (0.714-10.377)                                                                                         | 3.775 (0.338-8.833)                                                                                             | 0.297          |
| <i>H-ficolin</i>  | 48.79 (0.0-119.1)                                                                                            | 42.16 (8.135-119.1)                                                                                             | 0.604          |
| <i>CL-L1</i>      | 0.466 (0.299-0.712)                                                                                          | 0.466 (0.354-0.745)                                                                                             | 0.664          |
| <i>CL-K1</i>      | 0.499 (0.285-0.724)                                                                                          | 0.521 (0.326-0.920)                                                                                             | <b>0.026</b>   |
| <i>MASP-1</i>     | 10.39 (2.944-38.75)                                                                                          | 10.99 (3.290-33.48)                                                                                             | 0.483          |
| <i>MASP-3</i>     | 7.011 (3.029-20.45)                                                                                          | 7.482 (2.750-22.29)                                                                                             | <b>0.045</b>   |
| <i>MApp44</i>     | 2.427 (1.141-5.941)                                                                                          | 2.444 (1.053-8.674)                                                                                             | 0.933          |
| <i>MASP-2</i>     | 0.550 (0.065-3.612)                                                                                          | 0.544 (0.100-2.698)                                                                                             | 0.966          |
| <i>MApp19</i>     | 0.369 (0.050-0.990)                                                                                          | 0.367 (0.070-0.825)                                                                                             | 0.223          |

*Supplementary Figure 2.* Complement proteins and markers of inflammation. Fig. 2a-b. illustrates association between C3 and C4 and C3 and CRP. Fig. 2c-f. shows M-ficolin correlation to both C3, CRP, leucocytes and neutrophils.

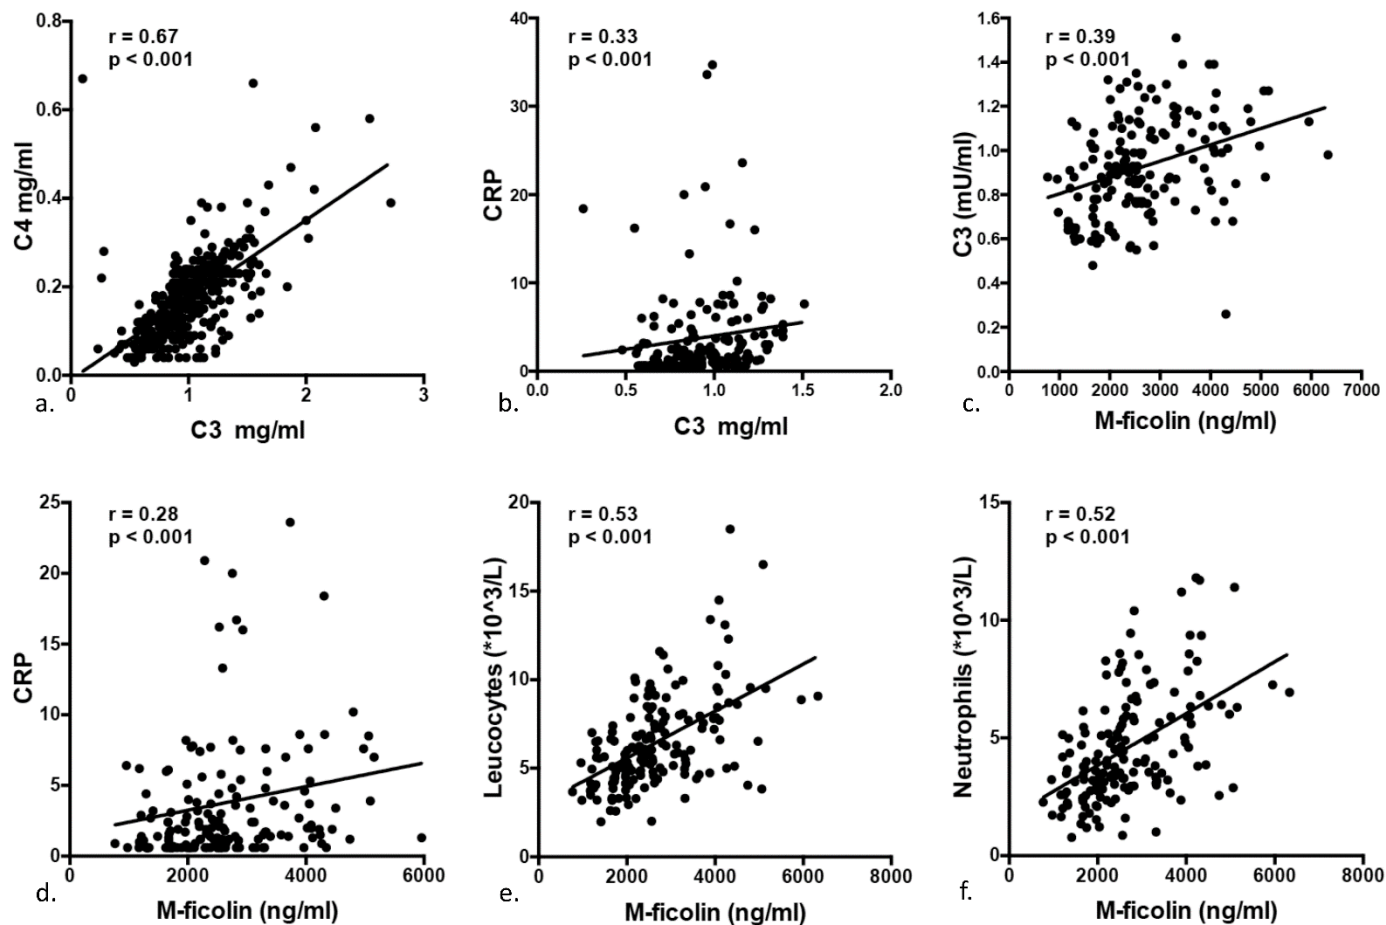

Supplementary Figure 3. Treatment effect on LP protein concentrations. Sup. fig 1a-k. Lectin pathway protein concentrations in 372 Danish SLE patients receiving different treatment modalities.

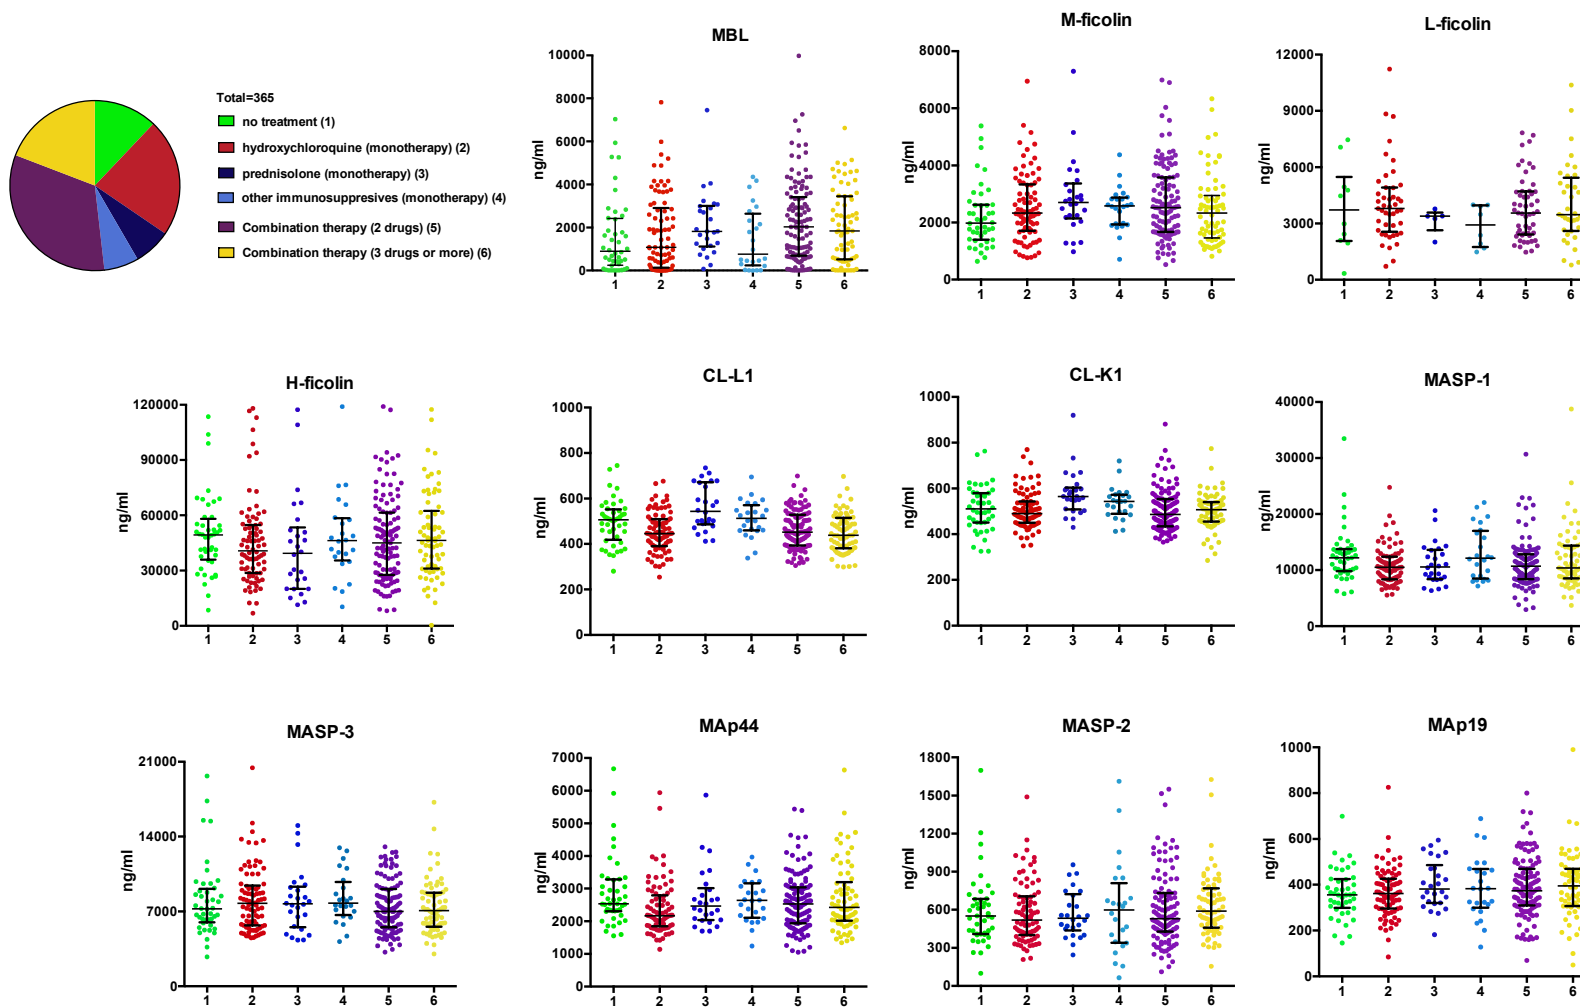

*Supplementary Figure 4.* Average SLEDAI and average LP protein concentration (with 95 % CI) at each sampling year for Swiss patients followed over time. The figure illustrates the influence of time as well as disease activity on protein concentrations.

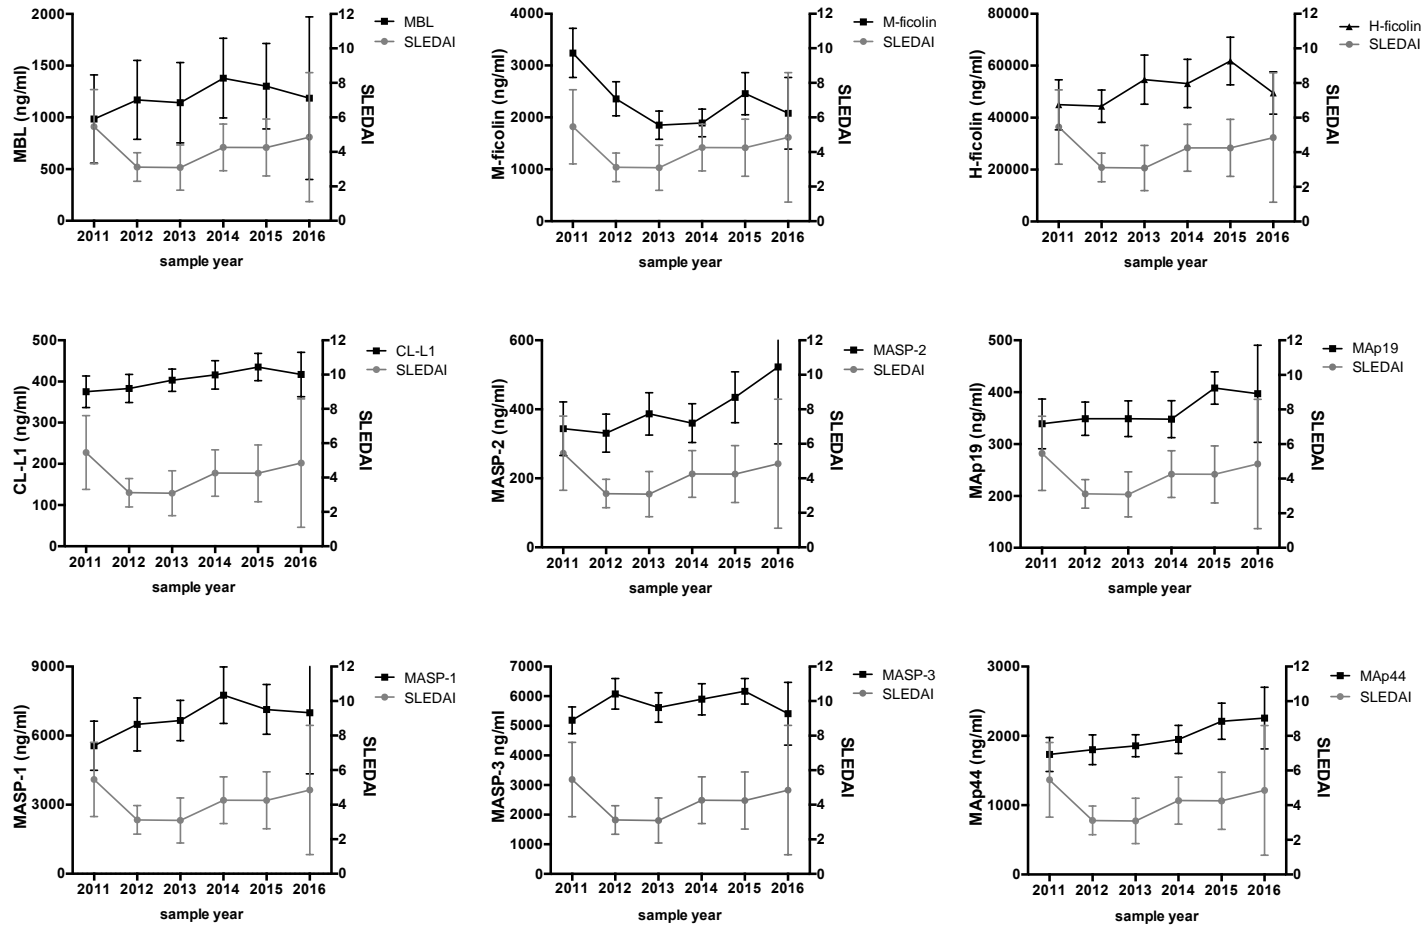

Supplement: 171033DataSuppl.pdf [file 171033DataSuppl.pdf]
